# Supplementary material for: Decreased recent adaptation at human mendelian disease genes as a possible consequence of interference between advantageous and deleterious variants
Source: eLife. 2021 Oct 12;10:e69026. doi: 10.7554/eLife.69026 (PMC8526059; doi:10.7554/eLife.69026)
Supplement: Figure 6—source data 1. [file elife-69026-fig6-data1.xlsx]

## Sheet: Sheet1
	confounding factor	low recombination	high recombination	low/high ratio
	average expression	2.75	2.59	1.06178
	lymphocyte expression	2.94	2.46	1.19512
	testis expression	3.44	3.19	1.07837
	GC content 50kb	43.5	46.5	0.935484
	GC content 500kb	43	45.9	0.936819
	CDS density 50kb	0.048	0.044	1.09091
	CDS density 500kb	0.03	0.028	1.07143
	conserved 50kb	0.075	0.066	1.13636
	conserved 500kb	0.058	0.051	1.13725
	DNASE 50kb	0.154	0.206	0.747573
	DNASE 500kb	0.134	0.18	0.744444
	PPI	1.138	1.106	1.02893
	gene length	96151	91620	1.04945
	neighbors 50kb	2.04	1.93	1.05699
	neighbors 500kb	8.93	8.96	0.996652
	number of virus interactions	0.783	0.664	1.17922
	% of immune genes	0.183	0.194	0.943299
	pN	0.00028	0.0004	0.7
	pS	0.00044	0.00065	0.676923
	pN/pS	0.636364	0.615385	1.03409
	McVicker's B	495	756	0.654762
