# Supplementary material for: Decreased recent adaptation at human mendelian disease genes as a possible consequence of interference between advantageous and deleterious variants
Source: eLife journal article supplement (doi:10.7554/elife.69026), 2021-10-11
Supplement: supp [file elife-69026-supp-v1.zip]

Archive with 1 entries (1 files):
- elife_poa_e69026_Transparent_Reporting_File.pdf
